# Supplementary material for: Oncogene Mutations, Copy Number Gains and Mutant Allele Specific Imbalance (MASI) Frequently Occur Together in Tumor Cells
Source: PLoS One. 2009 Oct 14;4(10):e7464. doi: 10.1371/journal.pone.0007464 (PMC2757721; doi:10.1371/journal.pone.0007464)
Supplement: Table S3 — a) Primer sequences for DNA sequencing b) Primer sequences for cDNA sequencing *, These primers were also used to detect KRAS or EGFR mutations in subrenal capsule mice xenografts of primary human NSCLCs because these primers are specific for human origin and no PCR product are amplified from mouse cDNA as PCR template. c) Primer sequences for restriction fragment length polymorphism *, The substitution of third letter in KRAS codon 61 (limited to CAT or CAC mutation) can change representative amino acid (Gltamine to Histysine). d) Primer sequences for copy number analyses by quantitative PCR (qPCR) assay e) Relative mRNA expression analyses by qPCR (0.03 MB XLS) [file pone.0007464.s003.xls]

## Sheet: Sup table3
Table S3) Primer sequences and PCR condition
a) DNA sequencing
Gene	exon	primer sequences (5' to 3')		Amplicon size (bps)	Tm (oC)	Cycles
KRAS	2	Forward	GTATTAACCTTATGTGTGACA	222	55	37
		Reverse	GTCCTGCACCAGTAATATGC
KRAS	4	Forward	CACTGTAATAATCCAGACTGTG	153	58	37
		Reverse	TCCCCAGTCCTCATGTACTG
EGFR	18	Forward	AGCATGGTGAGGGCTGAGGTGAC	263	65	35
		Reverse	ATATACAGCTTGCAAGGACTCTGG
EGFR	19	Forward	CCAGATCACTGGGCAGCATGTGGCACC	265	65	35
		Reverse	AGCAGGGTCTAGAGCAGAGCAGCTGCC
EGFR	20	Forward	GATCGCATTCATGCGTCTTCACC	362	65	35
		Reverse	TTGCTATCCCAGGAGCGCAGACC
EGFR	21	Forward	TCAGAG CCTGGCATGAACATGACCCTG	297	65	35
		Reverse	GGTCCCTGGTGTCAGGAAAATGCTGG
BRAF	11	Forward	TCC CTC TCA GGC ATA AGG TAA	313	56	35
		Reverse	CGA ACA GTG AAT ATT TCC TTT GAT
BRAF	15	Forward	TCA TAA TGC TTG CTC TGA TAG GA	224	56	35
		Reverse	GGC CAA AAA TTT AAT CAG TGG A
PIK3CA	9	Forward	AAT CAT CTG TGA ATC CAG AGG	273	54	38
		Reverse	ATG CTG AGA TCA GCC AAA T
PIK3CA	20	Forward	CAT TTG AGC AAA GAC CTG AAG G	359	58	36
		Reverse	TGA GCT TTC ATT TTC TCA GTT ATC
b) cDNA sequencing
Gene	exon	primer sequences (5' to 3')		Amplicon size (bps)	Tm (oC)	Cycles
KRAS*	2	Forward	CATTTCGGACTGGGAGC	285	60	40
		Reverse	TCCTCTTGACCTGCTGTGTCG
EGFR*	18-21	Forward	ACATCGTTCGGAAGCGCACGCTG	640	60	40
		Reverse	GATTCCAATGCCATCCACTTGATAGG
BRAF	11	Forward	AGGATTTCGTGGTGATGGAG	540	60	37
		Reverse	TAGCCAGTTGTGGCTTTGTG
BRAF	15	Forward	GCACAGGGCATGGATTACTT	195	58	37
		Reverse	GATGACTTCTGGTGCCATCC
PIK3CA	9	Forward	CCACGCAGGACTGAGTAACA	246	58	37
		Reverse	GGCCAATCTTTTACCAAGCA
PIK3CA	20	Forward	CTCAATGATGCTTGGCTCTG	205	58	37
		Reverse	TTTTCAGTTCAATGCATGCTG
c) RFLP
Gene	Detectable mutation type	primer sequences (5' to 3')		Amplicon size (bps)	Tm (oC)	Cycles	Enzyme	Restriction time	digestid size (bps)
KRAS	codon 12 (GGT to XXT)	Forward	AAACTTGTGGTAGTTGGACCT	137	50	40	BstNI	60oC overnight	117 + 20
		Reverse	GGTCCTGCACCAGTAATATG
KRAS	codon 61 (CAA to CAX)*	Forward	GGATATTCTCGACACAGCAGGTGA	176	50	48	EarI	37oC overnight	148 + 28
		Reverse	AATTACTCCTTAATGTCAGC
EGFR	exon 19 deletions	Forward	ATCCCAGAAGGTGAGAAAGATAAAATTC	120 - 138	60	40	N/A	N/A	N/A
		Reverse	CCTGAGGTTCAGAGCCATGGA
EGFR	exon 21 (codon 858: CTG to CXX)	Forward	CGCAGCATGTCAAGATCACAGAT	157	60	45	MscI	37oC overnight	97 + 60
		Reverse	TCCCTGGTGTCAGGAAAATGCT
d) Copy number analyses by qPCR
Gene		primer sequences (5' to 3')		Tm (oC)
KRAS		Forward	CACCCTAGACAAGCAGCCAATA	60
		Reverse	AAGCCCTGCCGCAAAAA
EGFR		Forward	CAAGGCCATGGAATCTGTCA	60
		Reverse	CTGGAATGAGGTGGAGGAACA
BRAF		Forward	CAAGTCACCACAAAAACCTATCGT	60
		Reverse	AACTGACTCACCACTGTCCTCTGTT
PIK3CA		Forward	GCAAAGGTTGGTCGGTGAA	60
		Reverse	GTGATCTTTGATGTTACTCTGATGCA
Line-1		Forward	AAAGCCGCTCAACTACATGG	60
		Reverse	TGCTTTGAATGCGTCCCAGAG
e) Relative mRNA expression analyses by qPCR
Gene		primer sequences (5' to 3')		Tm (oC)
KRAS		Forward	CTGGTGGCGTAGGCAAGAGT	60
		Reverse	TGTAGGAATCCTCTATTGTTGGATCA
EGFR		Forward	ATAGTCGCCCAAAGTTCCGTGAGT	60
		Reverse	ACCACGTCGTCCATGTCTTCTTCA
BRAF		Forward	ATCCTCATCAGCTCCCAATGTG	60
		Reverse	TTGATCCTCCATCACCACGAA
PIK3CA		Forward	AATCCCAGGTGGAATGAATG	60
		Reverse	CGGCCTTTAACAGAGCAAAT
GAPDH		Forward	TCGGAGTCAACGGATTTGGTC	60
		Reverse	AAACCATGTAGTTGAGGTCAATG
