# Supplementary material for: Oncogene Mutations, Copy Number Gains and Mutant Allele Specific Imbalance (MASI) Frequently Occur Together in Tumor Cells
Source: PLoS One. 2009 Oct 14;4(10):e7464. doi: 10.1371/journal.pone.0007464 (PMC2757721; doi:10.1371/journal.pone.0007464)
Supplement: Table S5 — CNG, copy number gain; Both, cases with both mutations and CNGs; NS, not significant (P>0.1); *, 314 tumors were analyzed because of lack of mutational and copy number data of EGFR gene in 19 Estonia cases; **, data were combined current study and our previous studies - Yamamoto et al (Cancer Res 68: 6913–6921) and Gandhi et al (PLoS ONE 4: e4576). (0.02 MB XLS) [file pone.0007464.s005.xls]

## Sheet: Sup table5
Table S5) Mutations and copy number gains of EGFR pathway genes
Gene	Alterations		Lung ca			Colorectal ca			Pancreatic ca
			Cell lines (n=85)	Tumors (n = 333)		Cell lines (n = 19)	Tumors (n = 60)		Cell lines (n = 10)
			% (n)	% (n)		% (n)	% (n)		% (n)
KRAS	Mutations		31% (26)	23% (78)		63% (12)	52% (31)		70% (7)
	CNG		11% (9)	10% (33)		32% (6)	15% (9)		10% (1)
	Both		8% (7) (P = 0.003)	5% (15) (P = 0.004)		21% (4) (NS)	10% (6) (NS)		10% (1) (NS)
EGFR	Mutations		12% (10)	25% (79)*		-	-		-
	CNG		16% (14)	39% (124)*		-	-		-
	Both		7% (6) (P = 0.001)	13.5% (45)* (P = 0.0003)		-	-		-
BRAF	Mutations		6% (5)	2% (11 )**		16% (3)	10% (6)		-
	CNG		4% (3)**	-		21% (4)	15% (9)		-
	Both		0% (0)**	-		0% (0)	0% (0)		-
PIK3CA	Mutations		7% (6)	3% (11)**		32% (6)	8% (5)		-
	CNG		9% (7)**	17% (61)**		11% (2)	23% (14)		-
	Both		0% (0)**	1% (4)**		0% (0)	0% (0)		-
